# Supplementary material
Source: HighWire-hosted journal article supplement (https://mentalhealth.bmj.com/content/21/1/7)
Supplement: inline-supplementary-material-1 [file inline-supplementary-material-1.pdf]

## Appendix A

### Search terms

**Date: 22 March 2017**

#### **Search 1:**

"medication\*" OR "pharmacotherapy" OR "treatment" AND "antidepressant\*" OR "selective serotonin reuptake inhibitors\*" OR "SSRIs" OR "Serotonin Uptake Inhibitors" [mh] OR "serotonin and norepinephrine reuptake inhibitors\*" OR "SNRIs" OR "norepinephrine and dopamine reuptake inhibitors\*" OR "NDRIs" OR "Tricyclic antidepressant\*" OR "TCAs" OR "monoamine oxidase inhibitors\*" OR "MAOIs" OR "Antidepressive Agents" [mh]) AND (network [tiab] OR mixed-treatment OR "multiple treatment\*") AND (meta-analysis)

("common mental disorders" OR "Anxiety disorders" OR "posttraumatic stress disorder\*" OR "post-traumatic" OR "posttraumatic" OR "post-traumatic stress disorder" OR "PSTD" OR "stress related disorders" OR "social phobia\*" OR "social anxiety" OR "SAD" OR "SP" OR "generalised anxiety disorder" OR "GAD" OR "obsessive-compulsive\*" OR "obsessive compulsive disorder" OR "OCD" OR "Depression" OR "Depressive Disorders" OR "Depressive Symptoms" OR "Unipolar Depression" OR "Bipolar Depression" OR "Moderate Depression" OR "Persistent Depression" OR "Panic Disorder" OR "PD" OR "Panic attacks" OR "Specific Phobias") AND ("medication\*" OR "pharmacotherapy" OR "treatment" AND ("Bayesian network meta-analysis" OR "indirect-treatment comparison" OR "mixed-treatment comparison" OR "multiple treatment network analysis\*" OR "NMA"

OR "network analysis" OR "network meta-analyses" OR "multiple-treatments meta-analysis"  
OR "multiple-treatment comparisons meta-analysis" OR "mixed-treatment comparisons  
meta-analysis" AND "systematic review\*" AND ("adult\*")

**Search 2:**

(buspirone OR phenelzine OR atomoxetine OR mirtazapine OR brofaromine OR  
moclobemide OR nefazodone OR venlafaxine OR citalopram OR escitalopram OR fluoxetine  
OR fluvoxamine OR paroxetine OR sertraline) AND (network [tiab] OR mixed-treatment OR  
"multiple treatment\*") AND (meta-analysis).
