# Supplementary material
Source: HighWire-hosted journal article supplement (https://mentalhealth.bmj.com/content/21/1/7)
Supplement: inline-supplementary-material-2 [file inline-supplementary-material-2.pdf]

**Supplementary Table 1: Descriptive Characteristics of Included NMAs (N=20)**

| Study                   | No. of RCTS/<br>Duration of<br>included RCTS<br>(weeks) | Subjects            | Disorder | Medication Class         | Diagnostic<br>Criteria | Outcomes<br>Acceptability (i.e. all<br>cause dropouts)<br>Tolerability (i.e. side<br>effects dropouts)         | Funding  |
|-------------------------|---------------------------------------------------------|---------------------|----------|--------------------------|------------------------|----------------------------------------------------------------------------------------------------------------|----------|
| Annemans et al.<br>2014 | NR<br>> 12 months                                       | 26,872<br>(approx.) | MDD      | NaSSA, SNRIs, SSRIs      | NR                     | <b>Cost</b><br>NIHDI, Societal<br><b>Response</b><br>NR<br><b>Acceptability, NR</b><br><b>Tolerability, NR</b> | NR       |
| Baldwin et al. 2011     | 27<br>8-12 weeks                                        | 7659<br>(approx.)   | GAD      | Placebo, SNRIs,<br>SSRIs | DSM-IV                 | <b>Cost, NR</b><br><b>Response</b><br>HAM-A<br><b>Tolerability</b><br>Side effects<br><b>Acceptability, NR</b> | Lundbeck |
| Cipriani et al. 2009    | 117                                                     | 25961               | MDD      | NARI, NaSSA, NDRI,       | DSM-IV, ICD-           | <b>Cost, NR</b>                                                                                                | None     |

|                        |                   |        |     |                                     |             |                                                                                                                                      |          |
|------------------------|-------------------|--------|-----|-------------------------------------|-------------|--------------------------------------------------------------------------------------------------------------------------------------|----------|
|                        | Weeks - NR        |        |     | SNRIs, SSRIs                        | 10          | <b>Response</b><br>CGI, HAM-D,<br>MADRS<br><br><b>Tolerability</b><br>Side effects<br><br><b>Acceptability</b><br>All cause dropouts |          |
| Coleman et al. 2012    | 27<br>8 weeks     | 7061   | MDD | Placebo, SNRIs                      | DSM defined | <b>Cost, NR</b><br><br><b>Response</b><br>HAM-D,17<br><br><b>Tolerability</b><br>Side effects<br><br><b>Acceptability, NR</b>        | NR       |
| Gartlehner et al. 2011 | 234<br>6-12 weeks | > 1000 | MDD | NaSSA, NDRI,<br>SARIs, SSRIs, SNRIs | NR          | <b>Cost, NR</b><br><br><b>Response</b><br>HAM-D, MADRS<br><br><b>Tolerability, NR</b><br><br><b>Acceptability, NR</b>                | AHRQ     |
| Hansen et al. 2008     | 18                | 6506   | SAD | Placebo, SNRI, SSRIs                | DSM defined | <b>Cost, NR</b>                                                                                                                      | Cecil G. |

|                     |                       |       |      |                                                     |                         |                                                                                                                    |                   |
|---------------------|-----------------------|-------|------|-----------------------------------------------------|-------------------------|--------------------------------------------------------------------------------------------------------------------|-------------------|
|                     | > 12 weeks            |       |      |                                                     |                         | <b>Response</b><br>CGI-I, LSAS<br><b>Tolerability</b><br>Side effects<br><b>Acceptability</b><br>Loss to follow-up | Sheps Center      |
| Jonas et al. 2013   | 34<br>10-12 weeks     | 4817  | PTSD | Placebo, NaSSA, NDRI, SNRI, SSRIs, TCA              | DSM defined             | <b>Cost, NR</b><br><b>Response</b><br>NR<br><b>Tolerability</b><br>Side effects<br><b>Acceptability, NR</b>        | NR                |
| Kriston et al. 2014 | 41<br>4-12/5-24 weeks | 4850  | MDD  | Placebo, MAOI, NARI, RIMA, SARI, SNRIs, SSRIs, TCAs | Standardised criteria   | <b>Cost, NR</b><br><b>Response</b><br>NR<br><b>Acceptability, NR</b><br><b>Tolerability, NR</b>                    | Grant<br>01KG0923 |
| Linde et al. 2015   | 66                    | 14177 | MDD  | Placebo, NARI, NaSSA, RIMAs,                        | DSM-IV, ICD 10 or older | <b>Cost, NR</b>                                                                                                    | Grant<br>01KG1012 |

|                        |                               |       |                           |                                                |             |                                                                                                                                                   |                |
|------------------------|-------------------------------|-------|---------------------------|------------------------------------------------|-------------|---------------------------------------------------------------------------------------------------------------------------------------------------|----------------|
|                        | 4-52 weeks                    |       |                           | SARI, SSRE, SSRIs, TCAs                        |             | <b>Response</b><br>CGI, HAM-D, MADRS<br><br><b>Tolerability</b><br>Side effects<br><br><b>Acceptability</b><br>All cause dropouts                 |                |
| Liu et al. 2013        | 11 Weeks – NR                 | 801   | MDD & Parkinson's Disease | Placebo, Dopamine agonists, SNRIs, SSRIs, TCAs | NR          | <b>Cost, NR</b><br><br><b>Response</b><br>BDI, CGI, HAM-D, MADRS<br><br><b>Tolerability, NR</b><br><br><b>Acceptability</b><br>All cause dropouts | None           |
| Mavranzuli et al. 2013 | 42 weeks – 8 weeks – 6 months | 13508 | GAD                       | Placebo, SNRIs, SSRIs                          | DSM defined | <b>Cost</b><br><br><b>Response</b><br>HAM-A<br><br><b>Tolerability, NR</b><br><br><b>Acceptability</b>                                            | NICE (Partial) |

|                         |                  |                   |     |                                                                                                                                  |                                    |                                                                                                                                                                                                                                                          |                        |
|-------------------------|------------------|-------------------|-----|----------------------------------------------------------------------------------------------------------------------------------|------------------------------------|----------------------------------------------------------------------------------------------------------------------------------------------------------------------------------------------------------------------------------------------------------|------------------------|
|                         |                  |                   |     |                                                                                                                                  |                                    | All cause dropouts                                                                                                                                                                                                                                       |                        |
| Mayo-Wilson et al. 2014 | 42<br>2-28 weeks | 8665<br>(approx.) | SAD | Placebo, MAOI,<br>NaSSA, RIMA, SNRI,<br>SSRIs                                                                                    | Based on<br>diagnostic<br>criteria | <b>Cost, NR</b><br><b>Recovery</b><br>ADIS, BAI, BDI,<br>FNE, SIAS, SPAI-<br>SP, SPS<br><b>Acceptability, NR</b><br><b>Tolerability, NR</b>                                                                                                              | NICE                   |
| Meister et al. 2016     | 34<br>4-24 weeks | 4769              | MDD | Placebo, 5-HT2<br>receptor antagonist,<br><br>Antipsychotics,<br>Benzodiazepine,<br>MAOIs, RIMA, SARI,<br><br>SNRIs, SSRIs, TCAs | NR                                 | <b>Cost, NR</b><br><b>Response, NR</b><br><b>Tolerability</b><br>Side effects, AE<br>checklist, Patient<br>reports, AE scale,<br><br>Interviews, Clinical<br>manual,<br>Retrospective chart<br>view, Clinical<br>observation<br><b>Acceptability, NR</b> | Grant<br>NWF-<br>14/06 |
| Naudet et al. 2013      | 31               | 7459              | MDD | Placebo, SNRI, SSRI                                                                                                              | DSM defined,<br>ICD-10             | <b>Cost, NR</b>                                                                                                                                                                                                                                          | INSERM                 |

|                                |                           |       |              |                                                                                             |                              |                                                                                                                |         |
|--------------------------------|---------------------------|-------|--------------|---------------------------------------------------------------------------------------------|------------------------------|----------------------------------------------------------------------------------------------------------------|---------|
|                                | 4-13 weeks                |       |              |                                                                                             |                              | <b>Response</b><br>HAM-D, MADRS<br><b>Acceptability, NR</b><br><b>Tolerability, NR</b>                         |         |
| Nussbaumer et al. 2014         | 101<br>6 weeks -12 months | 2333  | MDD          | Placebo, NDRIs, SARIs, SNRIs, SSRIs                                                         | NR                           | <b>Cost, NR</b><br><b>Response</b><br>HAM-D<br><b>Tolerability</b><br>Side effects<br><b>Acceptability, NR</b> | AHRQ    |
| Papadimitropou-lou et al. 2017 | 31<br>2-8 weeks           | NR    | MDD<br>(TRD) | Anticonvulsants, Antimanic agents, Atypical antipsychotics, NaSSA, SARI, SSRIs, SNRIs, TCAs | DSM-IV, HAM-D, 17, 24, MADRS | <b>Cost, NR</b><br><b>Response</b><br>MADRS<br><b>Tolerability</b><br>Side effects<br><b>Acceptability, NR</b> | Janssen |
| Ramsberg et al. 2012           | 87<br>> 6 weeks           | 19878 | MDD          | NARI, NaSSA, SNRIs, SSRIs, TCAs, TeCA                                                       | NR                           | <b>Costs</b><br><b>Response, NR</b>                                                                            | None    |

|                           |                  |             |                          |                                                                                                 |                        |                                                                                                                                                       |             |
|---------------------------|------------------|-------------|--------------------------|-------------------------------------------------------------------------------------------------|------------------------|-------------------------------------------------------------------------------------------------------------------------------------------------------|-------------|
|                           |                  |             |                          |                                                                                                 |                        | <b>Acceptability, NR</b><br><b>Tolerability, NR</b>                                                                                                   |             |
| Reichenpfader et al. 2014 | 63<br>6 weeks    | > 26000     | MDD & Sexual Dysfunction | Placebo, NaSSA, NDRIs, SARIs, SNRIs, SSRIs                                                      | DSM defined            | <b>Cost, NR</b><br><b>Measures</b><br>CES-D, CGI-I, CGI-S, CSFQ, HAM-D, MADRS, PGI<br><b>Tolerability</b><br>Side effects<br><b>Acceptability, NR</b> | None        |
| Skapinakis et al. 2016    | 64<br>4-24 weeks | 6652 (N=37) | OCD                      | TCA, SNRI, SSRIs                                                                                | DSM defined, FRDC, ICD | <b>Cost, NR</b><br><b>Response, NR</b><br><b>Tolerability, NR</b><br><b>Acceptability</b><br>All cause dropouts                                       | NIH         |
| Zhou et al. 2015          | 48<br>2-12 weeks | 6654        | MDD (TRD)                | Placebo, Anticonvulsant, Antipsychotics, Antimanic agents, Beta blockers, CNS stimulants, NDRI, | DSM defined, RDC       | <b>Cost, NR</b><br><b>Response</b><br>HAM-D $\geq$ 50,<br>MADRS $\geq$ 50                                                                             | Chinese NBR |

|  |  |  |  |                 |  |                                                                                   |  |
|--|--|--|--|-----------------|--|-----------------------------------------------------------------------------------|--|
|  |  |  |  | Thyroid hormone |  | <b>Tolerability</b><br>Side effects<br><b>Acceptability</b><br>All cause dropouts |  |
|--|--|--|--|-----------------|--|-----------------------------------------------------------------------------------|--|

ADIS: Anxiety Disorders Interview Schedule – Severity; AE: Adverse Events; AHRQ: Agency for Healthcare Research and Quality; Approx.: Approximately; BAI: Beck Anxiety Inventory; BDI: Beck Depression Inventory; CES-D: Center for Epidemiologic Studies Depression Scale; CGI-I: Clinical Global Impression Improvement; CGI-S: Clinical Global Impression–Severity; CNS: Central Nervous System; CSFQ: Changes in Sexual Functioning Questionnaire; DSM: *Diagnostic and Statistical Manual of Mental Disorders*; FNE: Fear of Negative Evaluation Scale; FRDC: Fairfax Renaissance Development Corporation; GAD: Generalised anxiety disorder; HAM-A: Hamilton anxiety scale; HAM-D: Hamilton Depression Rating Scale for Depression; ICD-10: International Statistical Classification of Diseases and Related Health Problems; Inc.: incorporated; INSERM: Institut National de la Santé et de la Recherche Médicale; LSAS: The Liebowitz Social Anxiety Scale (LSAS); MADRS: Montgomery-Åsberg Depression Rating Scale; Major depressive disorder; MAOI: Monoamine oxidase inhibitor; MDD: Major Depressive Disorder; NARI: Noradrenaline reuptake inhibitor; NaSSA: Noradrenergic and specific serotonergic Antidepressants; NBR: National Basic Research; NDRI: Norepinephrine and dopamine reuptake inhibitor; NICE: National Institute for Health and Clinical Excellence; NIH: National Institute for Health; NIHDI: National Institute for Health and Disability Insurance; N: Number of studies; No.: Number; NR: Not reported; NWF: Networking & TCP/IP Fundamentals; OCD: Obsessive Compulsive Disorder; PGI: Patient Global Impression of Improvement; PTSD: Posttraumatic stress disorder; RDC: Research Diagnostic Criteria; RIMA: Reversible inhibitors of monoamine oxidase A; SAD: Social Anxiety Disorder; SARI: Serotonin Antagonist and Reuptake Inhibitor; SIAS: Social Interaction Anxiety Scale; SNRI: Serotonin and norepinephrine reuptake inhibitor; SPAI-SP: Social Phobia Anxiety Inventory – Social Phobia Subscale; SPS: Social Phobia Scale; SSRE: Selective Serotonin Reuptake Enhancers; SSRI: Selective serotonin reuptake inhibitor; TCA: Tricyclic antidepressants; TeCA: Tetracyclic antidepressants; TRD: Treatment resistant.



**Supplementary Table 2: Explanation of Assessment Criteria based on Chambers et al. (2015) Survey**

| <b>CRITERIA</b>                                                                                                                                 | <b>No. of NMAs (%)</b>     |
|-------------------------------------------------------------------------------------------------------------------------------------------------|----------------------------|
| <b>Study method assessment criteria</b>                                                                                                         |                            |
| Was a Bayesian or a frequentist framework used to assess the probabilistic interpretation of uncertainty and ranking of interventions?          | 14 (66%)*<br>2 (10%)**     |
| Was the risk of bias of included clinical trials assessed to explain variability in either the results or the validity of the included studies? | 15 (71%)                   |
| Did the analysis include adjustments for model covariates to improve similarity and consistency assumptions to explain heterogeneity?           | 16 (76%)                   |
| Was a fixed or random effects model used to assess the true relative effects across studies?                                                    | 2 (10%)***<br>16 (76%)**** |
| Was an assessment of model fit reported to reduce confounding bias and were stable parameter estimates provided?                                | 16 (76%)                   |
| Was a sensitivity analysis performed to improve similarity and reduce inconsistency across studies?                                             | 14 (67%)                   |
| For studies with at least one closed loop, was the consistency of direct evidence and indirect evidence evaluated?                              | 16 (76%)                   |
| <b>Study transparency and reproducibility assessment criteria</b>                                                                               |                            |

|                                                                                                                                           |           |
|-------------------------------------------------------------------------------------------------------------------------------------------|-----------|
| Were the search terms reported for the replication of the study search?                                                                   | 18 (86%)  |
| Was a network diagram of included treatments presented for transparency of all comparisons investigated?                                  | 15 (71%)  |
| Was data from the included clinical studies necessary to reproduce the network meta-analysis presented?                                   | 21 (100%) |
| Was a table of key clinical study characteristics presented describing each of the included studies in the NMA?                           | 20 (95%)  |
| Was the model code presented or source cited (i.e. Bayesian framework only) for the replication of the analysis.                          | 3 (14%)   |
| <b>Presentation of study findings</b>                                                                                                     |           |
| Were pairwise comparisons of all included treatments presented for the assessment of discrepancy between direct and indirect comparisons? | 11 (52%)  |
| Was the probability of each treatment being best reported for the interpretation of uncertainty and ranking of interventions?             | 7 (33%)   |
| Was a ranking of treatments in terms of effectiveness reported for the interpretation of uncertainty and ranking of interventions?        | 7 (33%)   |

\*Bayesian framework; \*\*Frequentist framework; \*\*\*Fixed effects model; \*\*\*\*Random effects model;  
 NMAs: Network meta-analyses.

**Supplementary Table 3: Assessment of network meta-analysis study characteristics based on the extent to which the included studies complied with recommended standards for reporting NMA methodology (based on ISPOR guidelines for network meta analyses and demonstrated by Chambers et al. 2015, Zarin et al. (2017) and Petropoulou et al.'s (2017) reviews)**

| <b>Assessment criteria (N = 20)</b>              |                                         |                                        |                                                   |                                                               |                                                |                        |                 |
|--------------------------------------------------|-----------------------------------------|----------------------------------------|---------------------------------------------------|---------------------------------------------------------------|------------------------------------------------|------------------------|-----------------|
| <b>1. General study characteristics</b>          |                                         |                                        |                                                   |                                                               |                                                |                        |                 |
|                                                  | No. of treatments compared<br>Mean (SD) | Total no. of RCTs per NMA<br>Mean (SD) | Total no. of patients<br>Mean (SD)                | *HTA region (UK, USA, Europe, Australia, Africa)<br>Mean (SD) | Journal impact factor (2015/2016)<br>Mean (SD) |                        |                 |
|                                                  | 10.85 (5.23)                            | 58.84 (50.83)<br>(N = 19)              | 10295.89 (8443.1)<br>(N = 19)                     | 10 (50%)                                                      | 3.11 (1.32)<br>(N = 19)                        |                        |                 |
| <b>2. Study method</b>                           |                                         |                                        |                                                   |                                                               |                                                |                        |                 |
| Bayesian or Frequentist framework                | Risk of bias assessment                 | Adjustment for covariates              | Random effects model                              | Assessment of model fit                                       | Sensitivity analysis                           | Consistency reported** | Transitivity*** |
| 15 (75%)                                         | 15 (75%)                                | 15 (75%)                               | 15 (75%)                                          | 15 (75%)                                                      | 13 (65%)                                       | 15 (75%)               | 13 (65%)        |
| <b>3. Study transparency and reproducibility</b> |                                         |                                        |                                                   |                                                               |                                                |                        |                 |
|                                                  | Search terms reported                   | Network diagram                        | Extracted data from contributing clinical studies | Table of key clinical study characteristics                   | Model code****                                 |                        |                 |
|                                                  | 16 (80%)                                | 14 (70%)                               | 20 (100%)                                         | 19 (95%)                                                      | 3 (15%)                                        |                        |                 |
| <b>4. Presentation of study findings</b>         |                                         |                                        |                                                   |                                                               |                                                |                        |                 |
|                                                  | Full matrix of head-to-head comparisons | Reported probability of being best     | Ranking of included treatments                    |                                                               |                                                |                        |                 |
|                                                  | 10 (50%)                                | 9 (45%)                                | 9 (45%)                                           |                                                               |                                                |                        |                 |

\*HTA: health technology assessment regions; N: Number of studies; No.: Number; RCTs: Randomised control trials; SD: Standard deviation. \*HTA refers to the systematic evaluation of properties, effects, and/or impacts of health technology, for example the evaluation of the social, economic, organizational and ethical issues of a health intervention or health technology to inform policy decision making,[45];\*\*(Closed loops (i.e. any subset of interventions where each of that have been directly compared with one another,[11]); \*\*\* Transitivity: which implies that the distribution between the effect modifiers is similar across treatment comparisons; \*\*\*\*The model code refers to the software code for the Bayesian models used to calculate rankings.

**Supplementary Table 4: Reported best ranked treatments (based on ProbBest)**

| <b>Reported best ranked treatments (based on probability best) (N=9)</b> |                                    |                                          |                                                                               |                                                                                                                                       |
|--------------------------------------------------------------------------|------------------------------------|------------------------------------------|-------------------------------------------------------------------------------|---------------------------------------------------------------------------------------------------------------------------------------|
| <b>Disorder</b>                                                          | <b>Efficacy</b>                    | <b>Acceptability: All cause dropouts</b> | <b>Tolerability: Dropouts due to side effects</b>                             | <b>Cost effectiveness</b>                                                                                                             |
| MDD [16]                                                                 | --                                 | --                                       | --                                                                            | Escitalopram (SSRI)<br><br>61-100% more cost effective than the SSRI fluoxetine and the SNRI venlafaxine.<br><br>€30,000 per QALY.    |
| MDD [27]                                                                 | Mirtazapine (NaSSA)<br><br>(24.4%) | Escitalopram (SSRI)<br><br>(27.6%)       | Escitalopram (SSRI)<br><br>(27.6%)                                            | --                                                                                                                                    |
| MDD [31]                                                                 | --                                 | --                                       | TCA's pramipexole and pergolide, and SNRIs (unable to determine probability). | --                                                                                                                                    |
| MDD [32]                                                                 | --                                 | --                                       | --                                                                            | Escitalopram (SSRI)<br><br>Societal perspective: €14 755 per QALY (0.6978).<br><br>Health care perspective: €5 088 per QALY (0.6978). |
| MDD [35]                                                                 | Quetiapine (Antipsychotic)         | Thyroid hormone                          | Buspirone (5HT1A partial agonist) (84.5%)                                     | --                                                                                                                                    |

|          |                                            |                                            |                              |                                                              |
|----------|--------------------------------------------|--------------------------------------------|------------------------------|--------------------------------------------------------------|
|          | (81.3%)                                    | (85.9%)                                    |                              |                                                              |
| MDD [36] | Quetiapine 800 mg (aug)<br>(17.7%)         | --                                         | --                           | --                                                           |
| GAD [19] | Fluoxetine (SSRI)<br>(62.9%)               | --                                         | Sertraline (SSRI)<br>(49.3%) | --                                                           |
| GAD [38] | Duloxetine (SNRI)<br>(38%)                 | --                                         | Sertraline (SSRI)<br>(75%)   | Sertraline (SSRI)<br>75 %; £20,000 per extra<br>QALY gained. |
| OCD [40] | SSRIs (unable to determine<br>probability) | SSRIs (unable to determine<br>probability) |                              |                                                              |

Aug: Augmentation; GAD: Generalised anxiety disorder; MDD: Major depressive disorder; NaSSA: Noradrenergic and specific serotonergic Antidepressants; OCD: Obsessive compulsive disorder; QALY: Quality-adjusted life year; SNRI: Serotonin and norepinephrine reuptake inhibitor; SSRI: Selective serotonin reuptake inhibitor; TCAs: Tricyclic antidepressants.

**Supplementary Table 5: Reported treatments based on statistical significance**

| <b>Reported treatments based on statistical significance (N=20)</b> |                                                                                                                                                                                                   |                                                                                                                                                                                            |                                                                                                                                                                                                   |                                                                                                                                                             |
|---------------------------------------------------------------------|---------------------------------------------------------------------------------------------------------------------------------------------------------------------------------------------------|--------------------------------------------------------------------------------------------------------------------------------------------------------------------------------------------|---------------------------------------------------------------------------------------------------------------------------------------------------------------------------------------------------|-------------------------------------------------------------------------------------------------------------------------------------------------------------|
| <b>Disorder</b>                                                     | <b>Efficacy</b>                                                                                                                                                                                   | <b>Acceptability: All cause dropouts</b>                                                                                                                                                   | <b>Tolerability: Dropouts due to side effects</b>                                                                                                                                                 | <b>Cost effectiveness</b>                                                                                                                                   |
| MDD [16]                                                            | --                                                                                                                                                                                                | --                                                                                                                                                                                         | --                                                                                                                                                                                                | The SSRI escitalopram was identified as the optimal strategy: it dominated all other treatments except venlafaxine from the NIHDI and societal perspective. |
| MDD [18]                                                            | No difference was observed however TCAs, SSRIs, the SNRI venlafaxine, and a low-dose of the SARI trazodone was significantly superior.                                                            | --                                                                                                                                                                                         | RIMAs were associated with significantly fewer dropouts.                                                                                                                                          | --                                                                                                                                                          |
| MDD [24]                                                            | No difference, although the evidence favoured the SSRI escitalopram.                                                                                                                              | --                                                                                                                                                                                         | No difference in dropouts due to side effects.                                                                                                                                                    | --                                                                                                                                                          |
| MDD [27]                                                            | Mirtazapine (NaSSA), escitalopram (SSRI), venlafaxine (SNRI), and sertraline (SSRI) were significantly more efficacious than duloxetine (SNRI), fluoxetine (SSRI), fluvoxamine (SSRI), paroxetine | The SSRIs escitalopram and sertraline showed the best profile of acceptability, leading to significantly fewer discontinuations than did duloxetine (SNRI), fluvoxamine (SSRI), paroxetine | The SSRIs escitalopram and sertraline showed the best profile of tolerability, leading to significantly fewer discontinuations than did duloxetine (SNRI), fluvoxamine (SSRI), paroxetine (SSRI), | --                                                                                                                                                          |

|          |                                                                                                                                                                                                                                |                                                                             |                                                                                                                                                                                                                                                                                        |    |
|----------|--------------------------------------------------------------------------------------------------------------------------------------------------------------------------------------------------------------------------------|-----------------------------------------------------------------------------|----------------------------------------------------------------------------------------------------------------------------------------------------------------------------------------------------------------------------------------------------------------------------------------|----|
|          | (SSRI), and reboxetine (NARI). Reboxetine was significantly less efficacious than all the other antidepressants tested.                                                                                                        | (SSRI), reboxetine (NARI), and venlafaxine (SNRI).                          | reboxetine (NARI), and venlafaxine (SNRI).                                                                                                                                                                                                                                             |    |
| MDD [28] | A significant difference was found for the SSRIs fluoxetine, paroxetine and sertraline, the RIMA moclobemide, the TCA imipramine, the antipsychotic amisulpride, the 5HT1A partial agonist ritanserin, and acetyl-l-carnitine. | Sertraline (SSRI) and amisulpride (Antipsychotic) showed low dropout rates. | --                                                                                                                                                                                                                                                                                     | -- |
| MDD [29] | Antidepressant agents were significantly more efficacious than the placebos. The SNRI venlafaxine was more efficacious than the SSRI fluoxetine.                                                                               | --                                                                          | --                                                                                                                                                                                                                                                                                     | -- |
| MDD [30] | IR or extended-release formulations (the SNRI venlafaxine, SSRIs: fluoxetine, paroxetine and fluvoxamine, the SARI trazodone and the aminoketone bupropion) did not differ in efficacy.                                        | --                                                                          | Adverse event rates were comparable for the IR and the extended release formulation of paroxetine and fluoxetine. No difference was found for the SNRI venlafaxine formulations. No evidence was reported for the aminoketone bupropion, the SSRI fluvoxamine, and the SARI trazodone. | -- |



|          |                                                                                                                                                                                                                                                                         |    |                                                                                                                                                                                              |                                                                                                                                                                                                                                                                                                                                                                |
|----------|-------------------------------------------------------------------------------------------------------------------------------------------------------------------------------------------------------------------------------------------------------------------------|----|----------------------------------------------------------------------------------------------------------------------------------------------------------------------------------------------|----------------------------------------------------------------------------------------------------------------------------------------------------------------------------------------------------------------------------------------------------------------------------------------------------------------------------------------------------------------|
| MDD [31] | With efficacy of TCAs as the standard of comparison, the degree of difference was small in comparison to SSRIs; Pramipexole; Pergolide; SNRIs; and Placebo.                                                                                                             | -- | With Placebo as the standard of comparison, TCAs, pramipexole, pergolide and SNRIs showed better profile of acceptability, leading to significant fewer discontinuations than that of SSRIs. | --                                                                                                                                                                                                                                                                                                                                                             |
| MDD [32] | --                                                                                                                                                                                                                                                                      | -- | --                                                                                                                                                                                           | Despite its relatively high acquisition cost, the SSRI escitalopram is associated with a lower total cost compared with all other treatment strategies.<br><br>Furthermore, escitalopram is associated with a larger health gain (QALYs) at one year, and therefore dominates the other treatment strategies as more QALYs are achieved at a lower total cost. |
| MDD [33] | The 5HT1A partial agonist bupropion had a statistically significantly lower risk of sexual dysfunction than some other SGAD, and both the SSRI escitalopram and paroxetine showed a statistically significantly higher risk of sexual dysfunction than some other SGAD. | -- | Inconsistent and insufficient evidence to report this.                                                                                                                                       | --                                                                                                                                                                                                                                                                                                                                                             |

|          |                                                                                                                                                                |                                                                                                   |                                                                                                                                                                                                 |    |
|----------|----------------------------------------------------------------------------------------------------------------------------------------------------------------|---------------------------------------------------------------------------------------------------|-------------------------------------------------------------------------------------------------------------------------------------------------------------------------------------------------|----|
| MDD [34] | No difference (p=0.43)                                                                                                                                         | --                                                                                                | No difference (p=0.06), findings favour the SNRI desvenlafaxine.                                                                                                                                | -- |
| MDD [35] | The antipsychotics quetiapine and aripiprazole, the thyroid hormone, and the antimanic agent lithium were significantly more effective than placebo.           | In terms of acceptability, no significant difference was found between active agents and placebo. | In terms of tolerability, compared to placebo, the antipsychotics quetiapine, olanzapine, aripiprazole, and the antimanic agent lithium were significantly less well tolerated.                 | -- |
| MDD [36] | At 4, 6 and 8 weeks, the antipsychotic quetiapine (aug; 800 mg/day) and risperidone (aug) were found to be the first and second best treatments, respectively. | --                                                                                                | The most tolerable treatment was the anticonvulsant lamotrigine (aug) showing a comparable profile to placebo/sham.                                                                             | -- |
| MDD [37] | --                                                                                                                                                             | --                                                                                                | Medications associated with a high discontinuation rate: TCAs, SSRIs, MAOIs, antipsychotics, and the SARI trazodone. The odds were significantly higher for acetyl-l-carnitine, TCAs and SNRIs. | -- |
| SAD [17] | MAOIs (phenelzine), SSRIs (citalopram, escitalopram, fluoxetine, fluvoxamine, paroxetine and sertraline) and the SNRI venlafaxine had greater effects.         | --                                                                                                | --                                                                                                                                                                                              | -- |
| SAD [39] | No difference, the results favour the SSRIs escitalopram, fluvoxamine,                                                                                         | --                                                                                                | No difference except by profile.                                                                                                                                                                | -- |

|           |                                                                                                                                                                                                                                                                                                                                                                                                                                         |    |                                                                                                                                                                                                   |                                                                                                                                                                                                                                                               |
|-----------|-----------------------------------------------------------------------------------------------------------------------------------------------------------------------------------------------------------------------------------------------------------------------------------------------------------------------------------------------------------------------------------------------------------------------------------------|----|---------------------------------------------------------------------------------------------------------------------------------------------------------------------------------------------------|---------------------------------------------------------------------------------------------------------------------------------------------------------------------------------------------------------------------------------------------------------------|
|           | paroxetine, sertraline, and the SNRI venlafaxine.                                                                                                                                                                                                                                                                                                                                                                                       |    |                                                                                                                                                                                                   |                                                                                                                                                                                                                                                               |
| GAD [19]  | The SSRI fluoxetine was ranked first for response (probability of 62.9%).                                                                                                                                                                                                                                                                                                                                                               | -- | The SSRI sertraline was ranked first for tolerability (49.3%).                                                                                                                                    | --                                                                                                                                                                                                                                                            |
| GAD [38]  | In terms of conditional response, all drugs showed a significant effect over placebo. The SNRI duloxetine had the highest probability of resulting in conditional response (mean 0.649), followed by sertraline (SSRI), venlafaxine XL (SNRI), pregabalin (anticonvulsant), escitalopram (SSRI) and paroxetine (SSRI) (mean 0.516). Placebo had the lowest probability of conditional response among the options assessed (mean 0.425). | -- | The SSRI sertraline was the best drug in limiting discontinuation due to side effects and the second best drug in achieving response in patients not discontinuing treatment due to side effects. | The SSRI sertraline also resulted in the lowest costs and highest number of QALYs among all treatment options assessed. Its probability of being the most cost-effective drug reached 75% at a willingness-to-pay threshold of £20,000 per extra QALY gained. |
| PTSD [20] | No difference, the findings favour the SSRI paroxetine and the anticonvulsant topiramate.                                                                                                                                                                                                                                                                                                                                               | -- | --                                                                                                                                                                                                | --                                                                                                                                                                                                                                                            |
| OCD [40]  | SSRIs showed reductions in mean YBOCS, and the TCA clomipramine had a larger effect compared with placebo than did                                                                                                                                                                                                                                                                                                                      | -- | --                                                                                                                                                                                                | --                                                                                                                                                                                                                                                            |

|  |                                                |  |  |  |
|--|------------------------------------------------|--|--|--|
|  | SSRIs, but the difference was not significant. |  |  |  |
|--|------------------------------------------------|--|--|--|

Aug: Augmentation; GAD: Generalised anxiety disorder; IR: Immediate release; MAOIs: Monoamine oxidase inhibitors; MDD: Major depressive disorder; mg: Milligrams; NARI: Noradrenaline reuptake inhibitor; NaSSA: Noradrenergic and specific serotonergic antidepressants; NIHDI: National institute for health and disability insurance; OCD: Obsessive compulsive disorder; PTSD: Posttraumatic stress disorder; QALY: Quality-adjusted life year; RIMAs: Reversible inhibitors of monoamine oxidase A; SAD: Social anxiety disorder; SGAD: Social generalised anxiety disorder; SARIs: Serotonin antagonist and reuptake inhibitor; SNRI: Serotonin and norepinephrine reuptake inhibitor; SSRIs: Selective serotonin reuptake inhibitor; TCAs: Tricyclic antidepressants; XL: Long acting; YBOCS: Yale–Brown Obsessive Compulsive Scale.
